# Supplementary material for: Fluorescence quenching of the N-methylquinolinium cation by pairs of water or alcohol molecules
Source: Royal Society of Chemistry journal article supplement (doi:10.1039/c7cp07057h), 2017-11-24
Supplement: c7cp07057h1.pdf [file c7cp07057h1.pdf]

## Electronic Supplementary Information

### Fluorescence Quenching of the N-Methylquinolinium Cation by Pairs of Water or Alcohol Molecules

*Flor Rodríguez-Prieto,\* Carlos Costa Corbelle, Berta Fernández, Jorge A. Pedro, M. Carmen Ríos Rodríguez,\* and Manuel Mosquera\**

Centro Singular de Investigación en Química Biolóxica e Materiais Moleculares (CIQUS) and Departamento de Química Física, Facultade de Química, Universidade de Santiago de Compostela, E-15782 Santiago de Compostela, Spain.

#### Contents

|                                                                                                                               | Page |
|-------------------------------------------------------------------------------------------------------------------------------|------|
| <b>Title page and contents.....</b>                                                                                           | S1   |
| <b>Kinetic model.....</b>                                                                                                     | S2   |
| <b>Figure 1S.</b> Absorption and fluorescence spectra of $\text{MQ}^+$ in water.....                                          | S5   |
| <b>Figure 2S.</b> Absorption and fluorescence spectra of $\text{MQ}^+$ in methanol.....                                       | S5   |
| <b>Figure 3S.</b> Absorption and fluorescence spectra of $\text{MQ}^+$ in ethanol.....                                        | S6   |
| <b>Figure 4S.</b> Fluorescence spectra of $\text{MQ}^+$ in acetonitrile, water, methanol and ethanol.....                     | S6   |
| <b>Figure 5S.</b> Influence of water on the fluorescence of $\text{MQ}^+$ in acetonitrile.....                                | S7   |
| <b>Figure 6S.</b> Influence of ethanol on the fluorescence of $\text{MQ}^+$ in acetonitrile.....                              | S8   |
| <b>Figure 7S.</b> Influence of 1-propanol on the fluorescence of $\text{MQ}^+$ in acetonitrile.....                           | S9   |
| <b>Figure 8S.</b> Influence of 1,2-ethanediol on the fluorescence of $\text{MQ}^+$ in acetonitrile.....                       | S10  |
| <b>Figure 9S.</b> Influence of 1,3-propanediol on the fluorescence of $\text{MQ}^+$ in acetonitrile.....                      | S11  |
| <b>Figure 10S.</b> Fluorescence of $\text{MQ}^+$ in acetonitrile with addition of 2,2,2-trifluoroethanol.....                 | S12  |
| <b>Figure 11S.</b> Fluorescence decay of $\text{MQ}^+$ in acetonitrile with addition of alcohols.....                         | S12  |
| <b>Figure 12S.</b> PCGA results of the fluorescence of $\text{MQ}^+$ in acetonitrile with water.....                          | S13  |
| <b>Figure 13S.</b> PCGA results of the fluorescence of $\text{MQ}^+$ in acetonitrile with ethanol.....                        | S14  |
| <b>Figure 14S.</b> PCGA results of the fluorescence of $\text{MQ}^+$ in acetonitrile with 1-propanol.....                     | S15  |
| <b>Figure 15S.</b> PCGA results of the fluorescence of $\text{MQ}^+$ in acetonitrile with 1,2-ethanediol.....                 | S16  |
| <b>Figure 16S.</b> PCGA results of the fluorescence of $\text{MQ}^+$ in acetonitrile with 1,3-propanediol.....                | S17  |
| <b>Figure 17S.</b> Atom numbering for the complex $\text{MQ}^+-2\text{H}_2\text{O}$ .....                                     | S18  |
| <b>Table 1S.</b> Atomic coordinates for the optimized geometry of $\text{MQ}^+-2\text{H}_2\text{O}$ in the ground state.....  | S19  |
| <b>Table 2S.</b> Atomic coordinates for the optimized geometry of $\text{MQ}^+-2\text{H}_2\text{O}$ in the excited state..... | S20  |

### Kinetic model

From Scheme 1, the exciplex formation equilibrium constant  $K$  and the excited-state concentrations of  $\text{MQ}^{+*}$  and  $\text{E}^*$  are given by eqs S1 to S3, where  $[\text{T}^*]$  is the total concentration of excited species (eq S4).

$$K = \frac{[\text{E}^*]}{[\text{MQ}^{+*}] [\text{ROH}]} \quad (\text{S1})$$

$$[\text{MQ}^{+*}] = \frac{[\text{T}^*]}{1 + K [\text{ROH}]} \quad (\text{S2})$$

$$[\text{E}^*] = \frac{K [\text{ROH}] [\text{T}^*]}{1 + K [\text{ROH}]} \quad (\text{S3})$$

$$[\text{T}^*] = [\text{MQ}^{+*}] + [\text{E}^*] \quad (\text{S4})$$

The time dependence of  $[\text{T}^*]$  after a short light pulse is given by:

$$-\frac{d[\text{T}^*]}{dt} = k_{\text{MQ}} [\text{MQ}^{+*}] + (k_{\text{E}} + k_{\text{q}} [\text{ROH}]) [\text{E}^*] \quad (\text{S5})$$

Integration of eq S5, together with eqs S2 and S3, leads to relations S6 and S7, where  $[\text{T}^*]_0$  is the initial concentration of excited species.

$$[\text{T}^*] = [\text{T}^*]_0 e^{-k t} \quad (\text{S6})$$

$$k = \tau^{-1} = \frac{k_{\text{MQ}} + K k_{\text{E}} [\text{ROH}] + K k_{\text{q}} [\text{ROH}]^2}{1 + K [\text{ROH}]} \quad (\text{S7})$$

In the absence of quenchers,  $\tau^0 = 1/k_{\text{MQ}}$ , and therefore:

$$\frac{\tau^0}{\tau} = \frac{1 + \frac{K k_{\text{E}}}{k_{\text{MQ}}} [\text{ROH}] + \frac{K k_{\text{q}}}{k_{\text{MQ}}} [\text{ROH}]^2}{1 + K [\text{ROH}]} \quad (\text{S8})$$

From eqs S6, S2, and S3, the time dependence of  $[\mathbf{MQ}^{+*}]$  and  $[\mathbf{E}^*]$  can be easily calculated. Both show, like  $[\mathbf{T}^*]$ , a monoexponential decay with rate constant  $k$ , which displays a complex dependence on the hydroxy compound concentration (eq S7).

The fluorescence spectra of  $\mathbf{MQ}^{+*}$  and  $\mathbf{E}^*$  (vectors  $\mathbf{F}_{\mathbf{MQ}}$  and  $\mathbf{F}_{\mathbf{E}}$ ) depend on the steady-state (ss) concentrations of these species and are given by relations S9 and S10:

$$\mathbf{F}_{\mathbf{MQ}} = \chi^{\mathbf{MQ}} k_r^{\mathbf{MQ}} [\mathbf{MQ}^{+*}]_{\text{ss}} \quad (\text{S9})$$

$$\mathbf{F}_{\mathbf{E}} = \chi^{\mathbf{E}} k_r^{\mathbf{E}} [\mathbf{E}^*]_{\text{ss}} \quad (\text{S10})$$

In these equations,  $k_r^{\mathbf{MQ}}$  and  $k_r^{\mathbf{E}}$  are the radiative deactivation constants of  $\mathbf{MQ}^{+*}$  and  $\mathbf{E}^*$ , and the vectors  $\chi^{\mathbf{MQ}}$  and  $\chi^{\mathbf{E}}$  are the fluorescence emission spectra of  $\mathbf{MQ}^{+*}$  and  $\mathbf{E}^*$  with the area normalized to unity, multiplied by a common instrumental factor.  $[\mathbf{MQ}^{+*}]_{\text{ss}}$  and  $[\mathbf{E}^*]_{\text{ss}}$  are the steady-state concentrations of the respective species, obtained under continuous illumination.

Integration of eq S6 between time 0 and  $\infty$  gives the steady-state concentration of the excited species,  $[\mathbf{T}^*]_{\text{ss}}$ . Substitution of  $[\mathbf{T}^*]_{\text{ss}}$  into eqs S2 and S3 gives the steady-state concentrations  $[\mathbf{MQ}^{+*}]_{\text{ss}}$  and  $[\mathbf{E}^*]_{\text{ss}}$ , which substituted into eqs S9 and S10, yield:

$$\mathbf{F}_{\mathbf{MQ}} = \chi^{\mathbf{MQ}} \frac{k_r^{\mathbf{MQ}}}{k_{\mathbf{MQ}}} [\mathbf{T}^*]_0 \frac{1}{1 + \frac{K k_{\mathbf{E}}}{k_{\mathbf{MQ}}} [\text{ROH}] + \frac{K k_{\mathbf{q}}}{k_{\mathbf{MQ}}} [\text{ROH}]^2} \quad (\text{S11})$$

$$\mathbf{F}_{\mathbf{E}} = \chi^{\mathbf{E}} \frac{k_r^{\mathbf{E}}}{k_{\mathbf{E}}} [\mathbf{T}^*]_0 \frac{\frac{K k_{\mathbf{E}}}{k_{\mathbf{MQ}}} [\text{ROH}]}{1 + \frac{K k_{\mathbf{E}}}{k_{\mathbf{MQ}}} [\text{ROH}] + \frac{K k_{\mathbf{q}}}{k_{\mathbf{MQ}}} [\text{ROH}]^2} \quad (\text{S12})$$

The first factors of eqs S11 and S12 define  $\mathbf{F}_{\mathbf{MQ}}^0$  and  $\mathbf{F}_{\mathbf{E}}^0$ , the fluorescence spectra that would be obtained for  $\mathbf{MQ}^{+*}$  and  $\mathbf{E}^*$  if each absorbed photon formed an excited molecule of the respective species and only the unimolecular deactivation of these species would be operative:

$$\mathbf{F}_{\mathbf{MQ}}^0 = \chi^{\mathbf{MQ}} \frac{k_r^{\mathbf{MQ}}}{k_{\mathbf{MQ}}} [\mathbf{T}^*]_0 \quad (\text{S13})$$

$$\mathbf{F}_{\mathbf{E}}^0 = \chi^{\mathbf{E}} \frac{k_r^{\mathbf{E}}}{k_{\mathbf{E}}} [\mathbf{T}^*]_0 \quad (\text{S14})$$

The observed fluorescence spectrum is therefore:

$$\mathbf{F} = \mathbf{F}_{\mathbf{MQ}} + \mathbf{F}_{\mathbf{E}} = C_{\mathbf{MQ}} \mathbf{F}_{\mathbf{MQ}}^0 + C_{\mathbf{E}} \mathbf{F}_{\mathbf{E}}^0 \quad (\text{S15})$$

where the coefficients  $C_{\mathbf{MQ}}$  and  $C_{\mathbf{E}}$ , which represent the contributions of  $\mathbf{MQ}^{+*}$  and  $\mathbf{E}^*$  spectra to the experimental spectrum, are given by:

$$C_{\mathbf{MQ}} = \frac{1}{1 + \frac{K k_{\mathbf{E}}}{k_{\mathbf{MQ}}} [\text{ROH}] + \frac{K k_{\mathbf{q}}}{k_{\mathbf{MQ}}} [\text{ROH}]^2} \quad (\text{S16})$$

$$C_{\mathbf{E}} = \frac{\frac{K k_{\mathbf{E}}}{k_{\mathbf{MQ}}} [\text{ROH}]}{1 + \frac{K k_{\mathbf{E}}}{k_{\mathbf{MQ}}} [\text{ROH}] + \frac{K k_{\mathbf{q}}}{k_{\mathbf{MQ}}} [\text{ROH}]^2} \quad (\text{S17})$$

We denote by  $\Phi_{\mathbf{MQ}}^0$  the fluorescence quantum yield of  $\mathbf{MQ}^+$  in ACN in the absence of quenchers ( $\Phi_{\mathbf{MQ}}^0 = k_r^{\mathbf{MQ}}/k_{\mathbf{MQ}}$ ) and by  $\eta_{\mathbf{E}}^0$  the fluorescence quantum efficiency of  $\mathbf{E}^*$  if only the unimolecular photophysical deactivation of this excited species would be operative ( $\eta_{\mathbf{E}}^0 = k_r^{\mathbf{E}}/k_{\mathbf{E}}$ ). As  $\mathbf{F}_{\mathbf{MQ}}^0$  and  $\mathbf{F}_{\mathbf{E}}^0$  are normalized to the same concentration of excited species (eqs S13 and S14), the ratio of their integrated areas equals the ratio of fluorescence quantum yields:

$$\frac{\int \mathbf{F}_{\mathbf{MQ}}^0 d\tilde{\nu}}{\int \mathbf{F}_{\mathbf{E}}^0 d\tilde{\nu}} = \frac{\Phi_{\mathbf{MQ}}^0}{\eta_{\mathbf{E}}^0} \quad (\text{S18})$$

From the experimental value of this ratio and the known value of  $\Phi_{\mathbf{MQ}}^0$ , we calculate  $\eta_{\mathbf{E}}^0$ , which together with  $k_{\mathbf{E}}$  allows the determination of the radiative and nonradiative deactivation constant of the exciplex:

$$k_r^{\mathbf{E}} = \eta_{\mathbf{E}}^0 k_{\mathbf{E}} \quad (\text{S19})$$

$$k_{nr}^{\mathbf{E}} = k_{\mathbf{E}} - k_r^{\mathbf{E}} \quad (\text{S20})$$

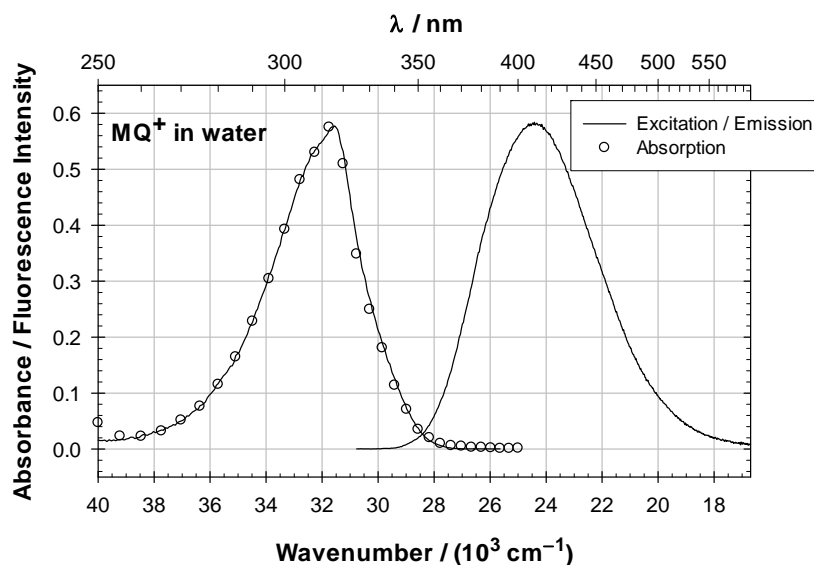

**Figure 1S.** Normalized absorption, fluorescence excitation, and fluorescence emission spectra of the N-methylquinolinium cation in water.  $[\text{MQ}^+] = 9.29 \times 10^{-6} \text{ M}$  (fluorescence spectra) and  $[\text{MQ}^+] = 7.65 \times 10^{-5} \text{ M}$  (absorption spectrum).  $\tilde{\nu}_{\text{excitation}} = 31950 \text{ cm}^{-1}$ .  $\tilde{\nu}_{\text{emission}} = 24630 \text{ cm}^{-1}$ .

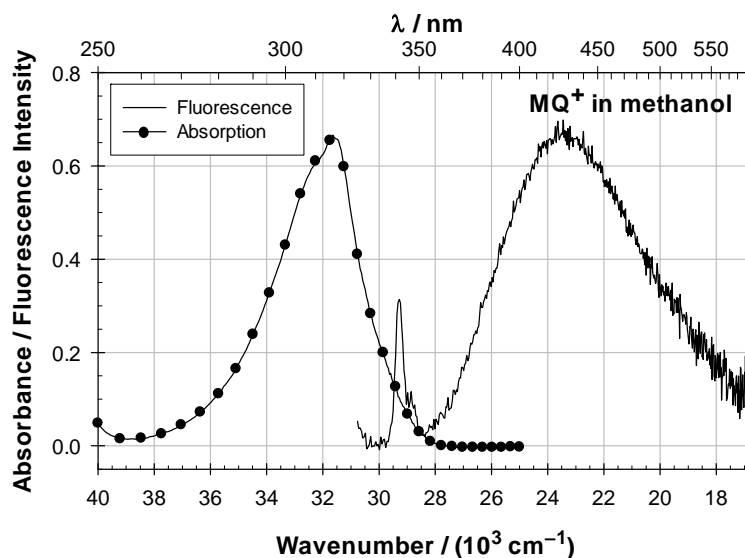

**Figure 2S.** Normalized absorption and fluorescence emission spectra of the N-methylquinolinium cation in methanol, and solvent Raman band.  $[\text{MQ}^+] = 9.03 \times 10^{-6} \text{ M}$  (fluorescence spectrum) and  $[\text{MQ}^+] = 8.45 \times 10^{-5} \text{ M}$  (absorption spectrum).  $\tilde{\nu}_{\text{excitation}} = 31950 \text{ cm}^{-1}$ .

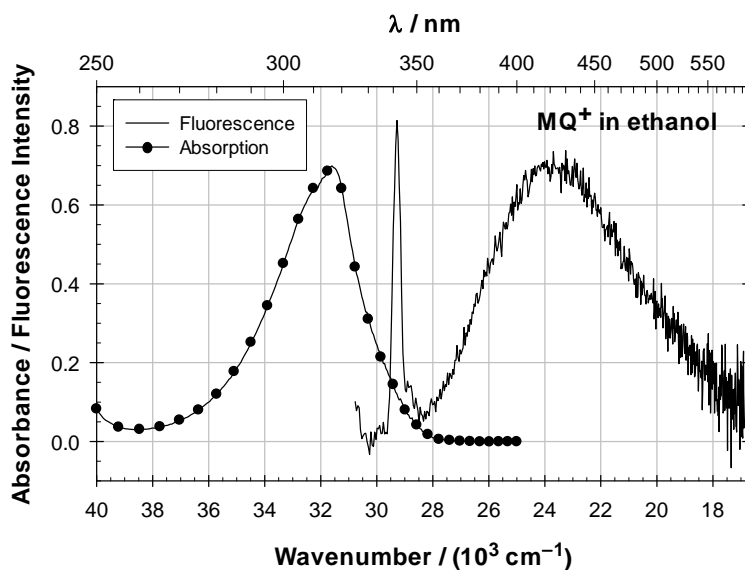

**Figure 3S.** Normalized absorption and fluorescence emission spectra of the N-methylquinolinium cation in ethanol, and solvent Raman band.  $[\text{MQ}^+] = 9.86 \times 10^{-6} \text{ M}$  (fluorescence spectrum) and  $[\text{MQ}^+] = 9.23 \times 10^{-5} \text{ M}$  (absorption spectrum).  $\tilde{\nu}_{\text{excitation}} = 31950 \text{ cm}^{-1}$ .

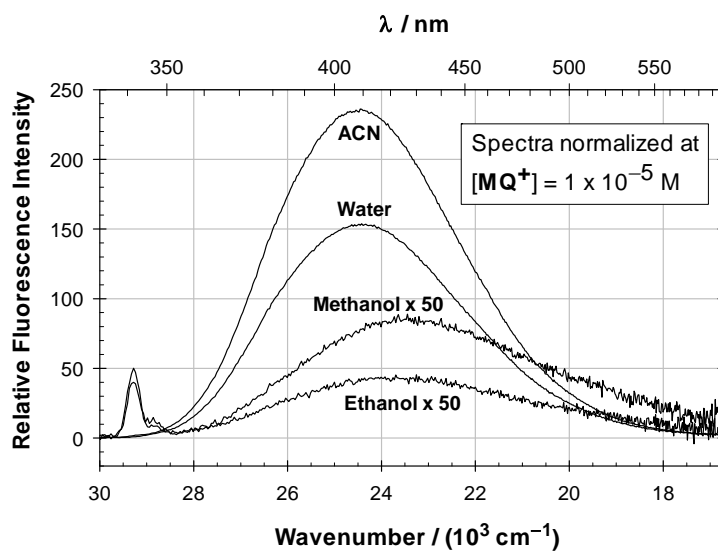

**Figure 4S.** Fluorescence emission spectra of the N-methylquinolinium cation in acetonitrile, water, methanol and ethanol, normalized at  $\text{MQ}^+$  concentration of  $1 \times 10^{-5} \text{ M}$ , and alcohol Raman band. The intensity of the spectra in methanol and ethanol were multiplied by a factor of 50.  $\tilde{\nu}_{\text{excitation}} = 31950 \text{ cm}^{-1}$ .

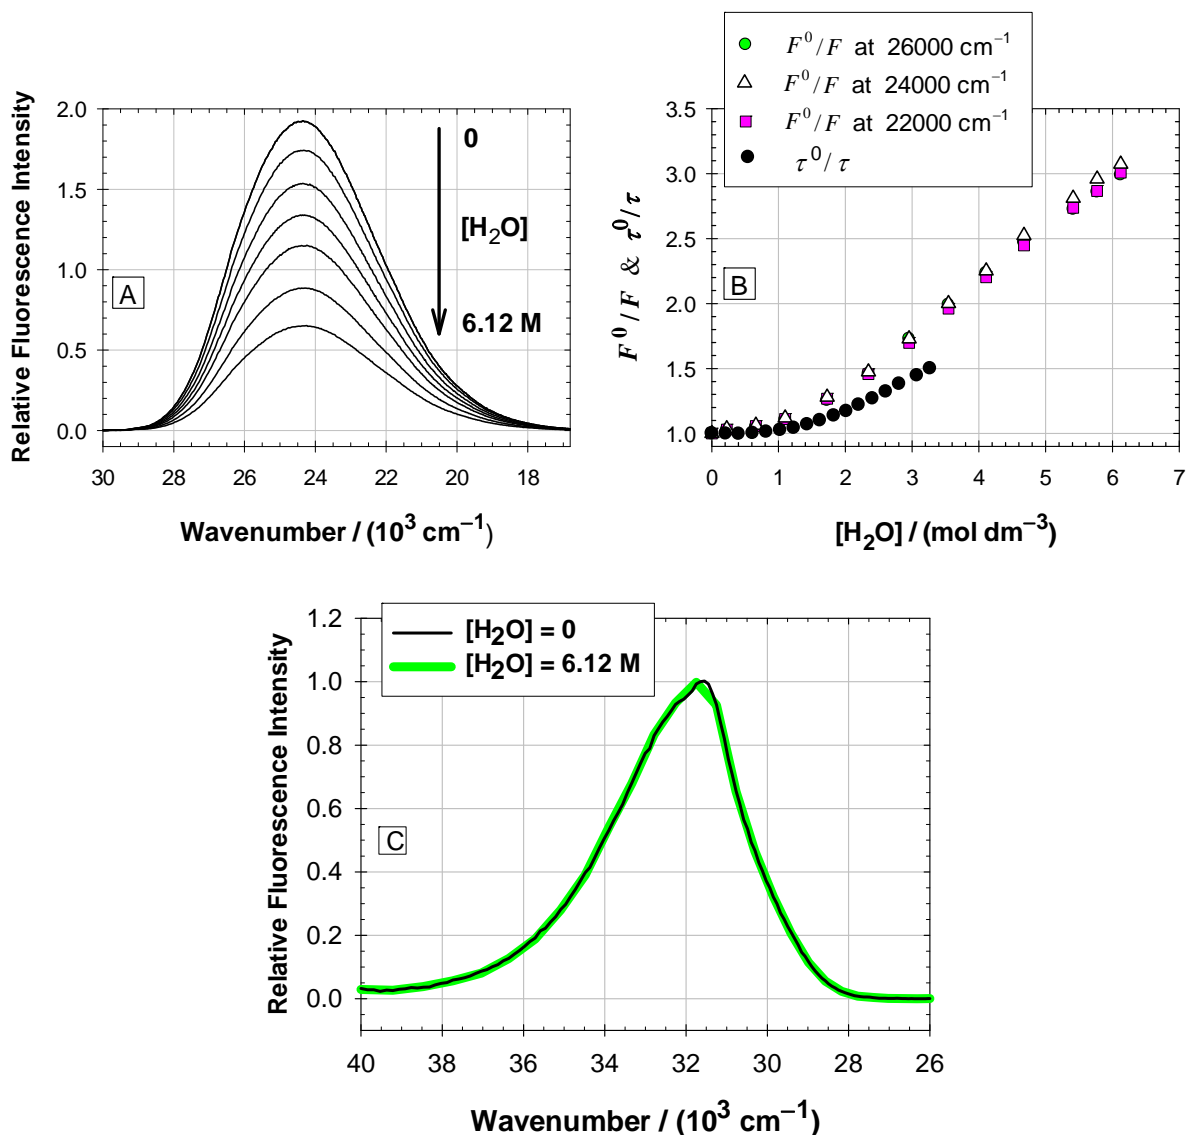

**Figure 5S.** Influence of water on the fluorescence spectra of  $\text{MQ}^+$  in acetonitrile: (A) Fluorescence emission spectra with increasing concentration of water in the range 0 to 6.12  $\text{mol/dm}^3$  ( $\tilde{\nu}_{\text{exc}} = 31950 \text{ cm}^{-1}$ ); (B) Influence of water concentration on the fluorescence intensity ratio  $F^0/F$  at various emission wavenumbers ( $\tilde{\nu}_{\text{exc}} = 31950 \text{ cm}^{-1}$ ), and on the fluorescence lifetime ratio  $\tau^0/\tau$  ( $\tilde{\nu}_{\text{exc}} = 32450 \text{ cm}^{-1}$ ,  $\tilde{\nu}_{\text{em}} = 24400 \text{ cm}^{-1}$ ); (C) Normalized fluorescence excitation spectra in pure acetonitrile and with addition of 6.12  $\text{mol/dm}^3$  of water ( $\tilde{\nu}_{\text{em}} = 24630 \text{ cm}^{-1}$ ).  $[\text{MQ}^+] = 9.13 \times 10^{-6} \text{ mol/dm}^3$  for the steady-state measurements and  $1.04 \times 10^{-4} \text{ mol/dm}^3$  for the lifetime measurements.

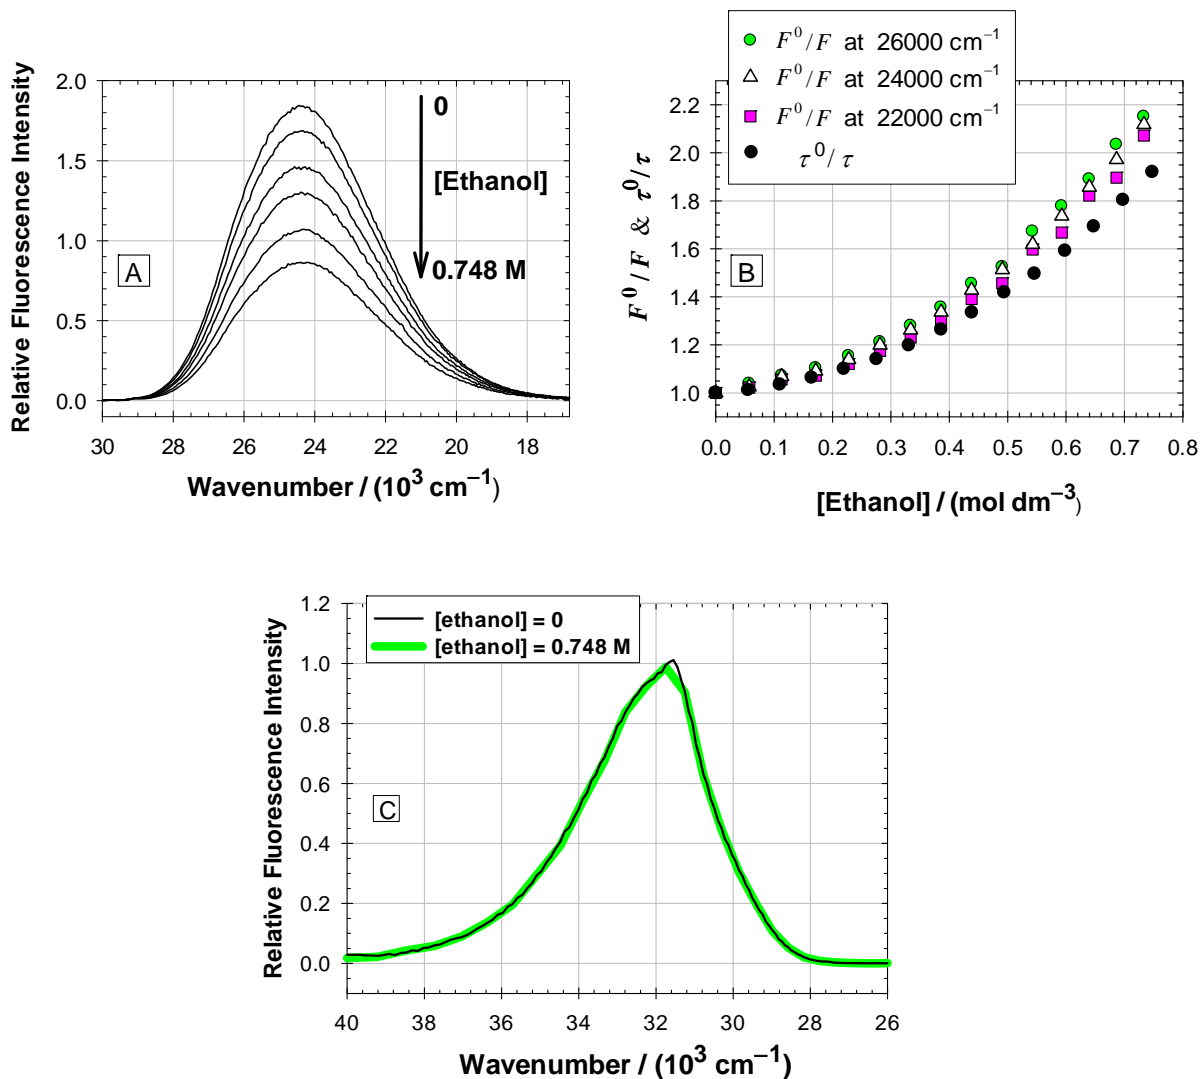

**Figure 6S.** Influence of ethanol on the fluorescence spectra of  $\text{MQ}^+$  in acetonitrile: (A) Fluorescence emission spectra with increasing concentration of ethanol in the range 0 to 0.748  $\text{mol/dm}^3$  ( $\tilde{\nu}_{\text{exc}} = 31950 \text{ cm}^{-1}$ ); (B) Influence of ethanol concentration on the fluorescence intensity ratio  $F^0/F$  at various emission wavenumbers ( $\tilde{\nu}_{\text{exc}} = 31950 \text{ cm}^{-1}$ ), and on the fluorescence lifetime ratio  $\tau^0/\tau$  ( $\tilde{\nu}_{\text{exc}} = 32450 \text{ cm}^{-1}$ ,  $\tilde{\nu}_{\text{em}} = 24400 \text{ cm}^{-1}$ ); (C) Normalized fluorescence excitation spectra in pure acetonitrile and with addition of 0.748  $\text{mol/dm}^3$  of ethanol ( $\tilde{\nu}_{\text{em}} = 24630 \text{ cm}^{-1}$ ).  $[\text{MQ}^+] = 8.25 \times 10^{-6} \text{ mol/dm}^3$  for the steady-state measurements and  $1.02 \times 10^{-4} \text{ mol/dm}^3$  for the lifetime measurements.

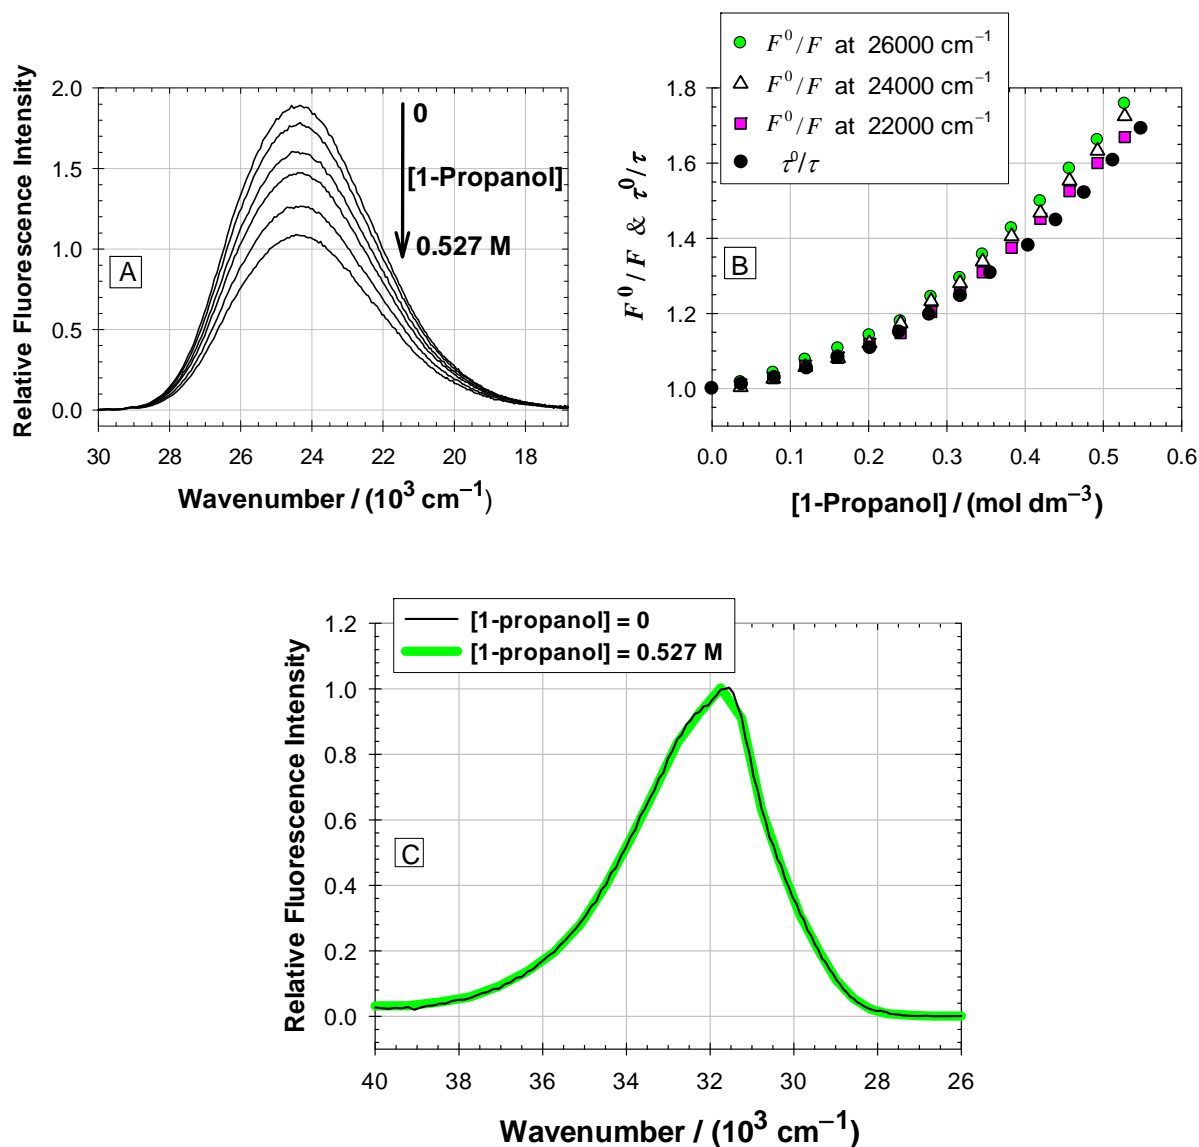

**Figure 7S.** Influence of 1-propanol on the fluorescence spectra of  $\text{MQ}^+$  in acetonitrile: (A) Fluorescence emission spectra with increasing concentration of 1-propanol in the range 0 to 0.527  $\text{mol dm}^{-3}$  ( $\tilde{\nu}_{\text{exc}} = 31950 \text{ cm}^{-1}$ ); (B) Influence of 1-propanol concentration on the fluorescence intensity ratio  $F^0/F$  at various emission wavenumbers ( $\tilde{\nu}_{\text{exc}} = 31950 \text{ cm}^{-1}$ ), and on the fluorescence lifetime ratio  $\tau^0/\tau$  ( $\tilde{\nu}_{\text{exc}} = 32450 \text{ cm}^{-1}$ ,  $\tilde{\nu}_{\text{em}} = 24400 \text{ cm}^{-1}$ ); (C) Normalized fluorescence excitation spectra in pure acetonitrile and with addition of 0.527  $\text{mol dm}^{-3}$  of 1-propanol ( $\tilde{\nu}_{\text{em}} = 24630 \text{ cm}^{-1}$ ).  $[\text{MQ}^+] = 8.95 \times 10^{-6} \text{ mol dm}^{-3}$  for the steady-state measurements and  $1.00 \times 10^{-4} \text{ mol dm}^{-3}$  for the lifetime measurements.

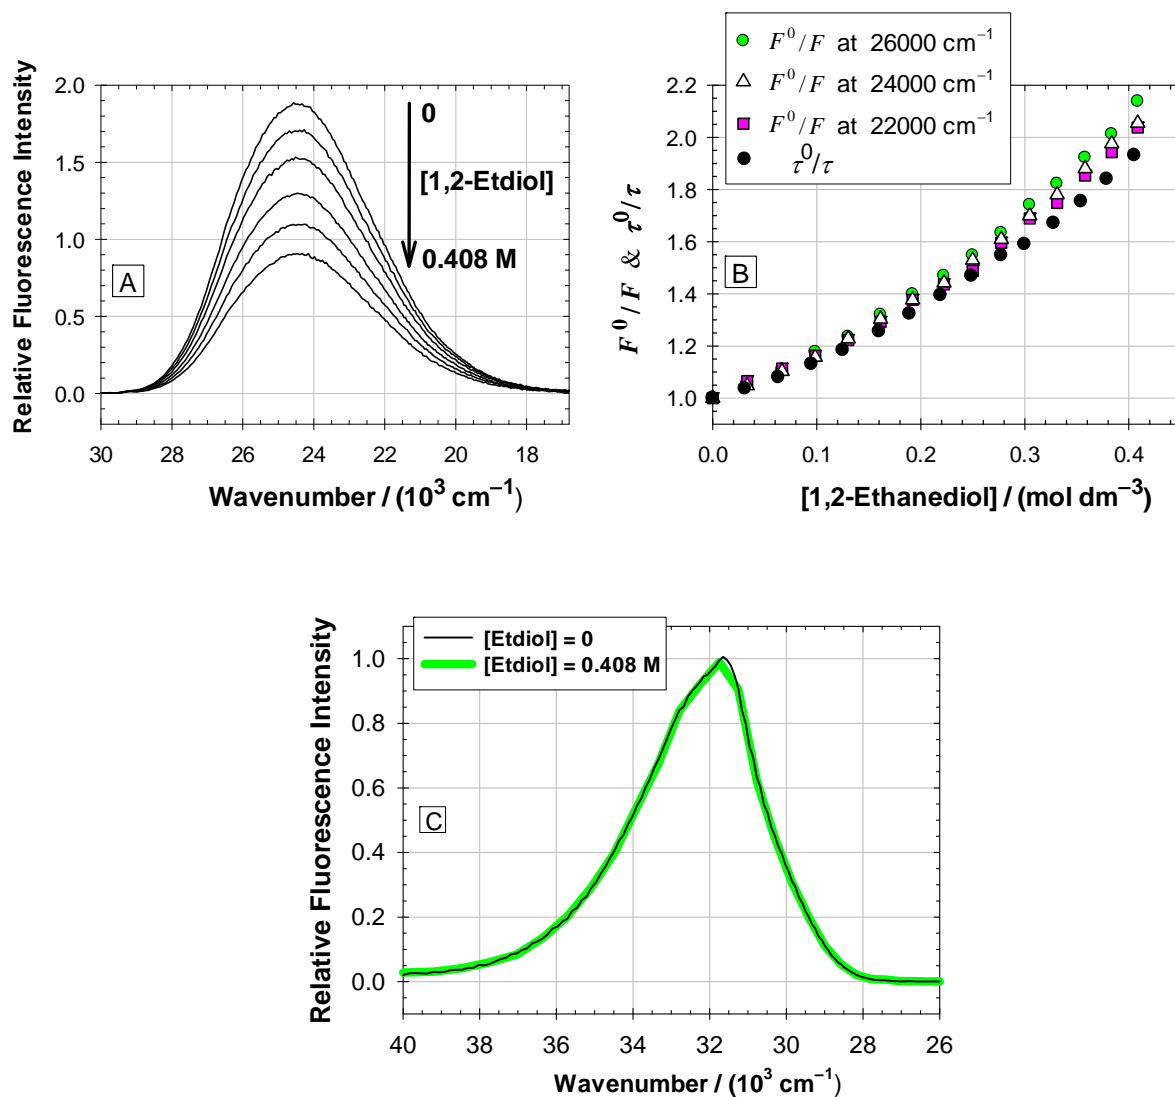

**Figure 8S.** Influence of 1,2-ethanediol on the fluorescence spectra of  $\text{MQ}^+$  in acetonitrile: (A) Fluorescence emission spectra with increasing concentration of 1,2-ethanediol in the range 0 to 0.408  $\text{mol/dm}^3$  ( $\tilde{\nu}_{\text{exc}} = 31950 \text{ cm}^{-1}$ ); (B) Influence of 1,2-ethanediol concentration on the fluorescence intensity ratio  $F^0/F$  at various emission wavenumbers ( $\tilde{\nu}_{\text{exc}} = 31950 \text{ cm}^{-1}$ ), and on the fluorescence lifetime ratio  $\tau^0/\tau$  ( $\tilde{\nu}_{\text{exc}} = 32450 \text{ cm}^{-1}$ ,  $\tilde{\nu}_{\text{em}} = 24400 \text{ cm}^{-1}$ ); (C) Normalized fluorescence excitation spectra in pure acetonitrile and with addition of 0.408  $\text{mol/dm}^3$  of 1,2-ethanediol ( $\tilde{\nu}_{\text{em}} = 24630 \text{ cm}^{-1}$ ).  $[\text{MQ}^+] = 8.27 \times 10^{-6} \text{ mol/dm}^3$  for the steady-state measurements and  $9.95 \times 10^{-5} \text{ mol/dm}^3$  for the lifetime measurements.

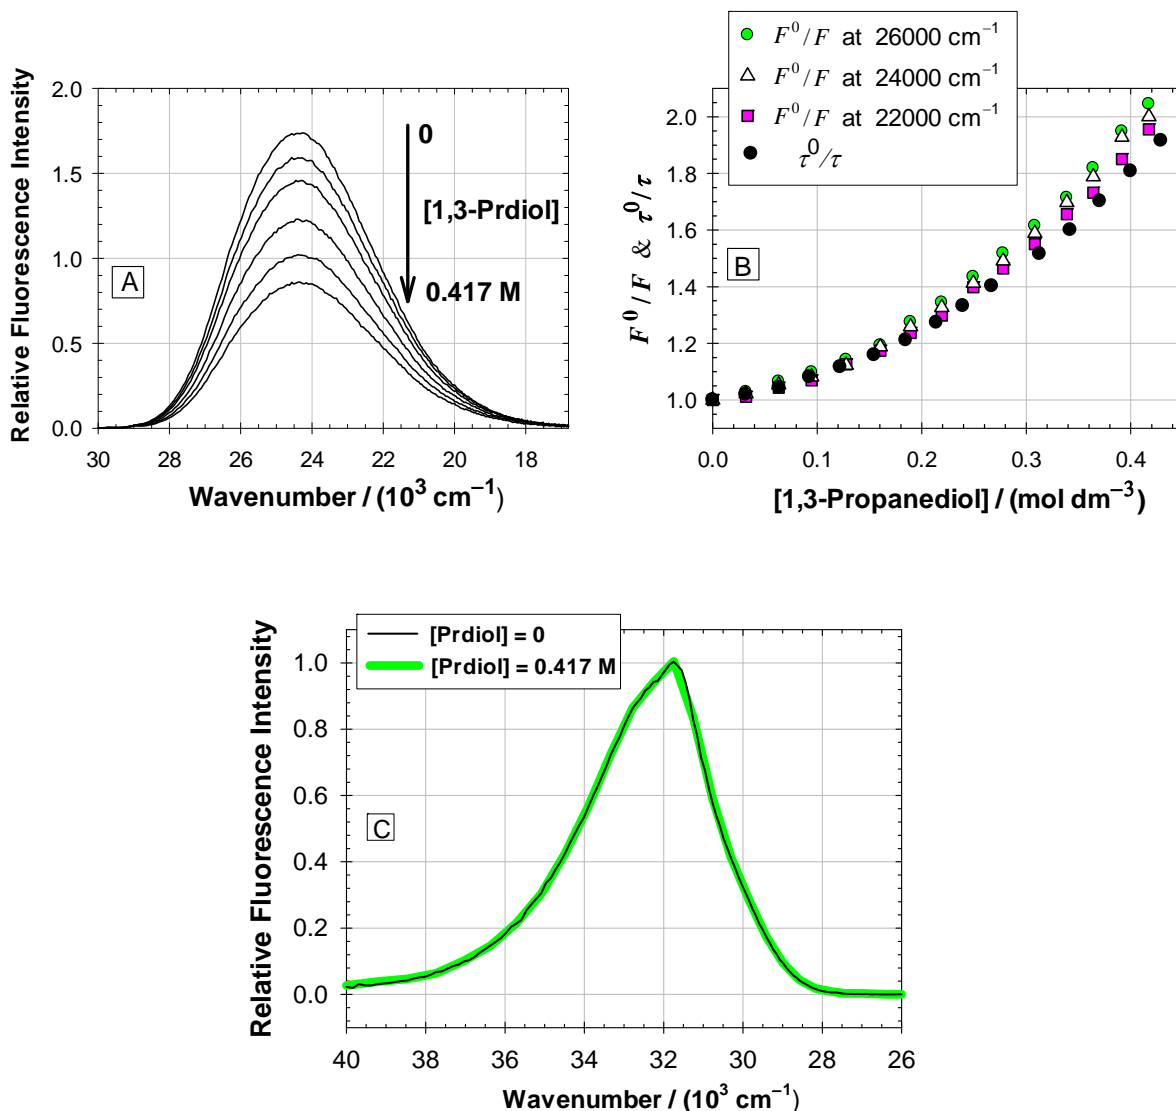

**Figure 9S.** Influence of 1,3-propanediol on the fluorescence spectra of  $\text{MQ}^+$  in acetonitrile: (A) Fluorescence emission spectra with increasing concentration of 1,3-propanediol in the range 0 to  $0.417 \text{ mol/dm}^3$  ( $\tilde{\nu}_{\text{exc}} = 31950 \text{ cm}^{-1}$ ); (B) Influence of 1,3-propanediol concentration on the fluorescence intensity ratio  $F^0/F$  at various emission wavenumbers ( $\tilde{\nu}_{\text{exc}} = 31950 \text{ cm}^{-1}$ ), and on the fluorescence lifetime ratio  $\tau^0/\tau$  ( $\tilde{\nu}_{\text{exc}} = 32450 \text{ cm}^{-1}$ ,  $\tilde{\nu}_{\text{em}} = 24400 \text{ cm}^{-1}$ ); (C) Normalized fluorescence excitation spectra in pure acetonitrile and with addition of  $0.417 \text{ mol/dm}^3$  of 1,3-propanediol ( $\tilde{\nu}_{\text{em}} = 24630 \text{ cm}^{-1}$ ).  $[\text{MQ}^+] = 7.52 \times 10^{-6} \text{ mol/dm}^3$  for the steady-state measurements and  $9.96 \times 10^{-5} \text{ mol/dm}^3$  for the lifetime measurements.

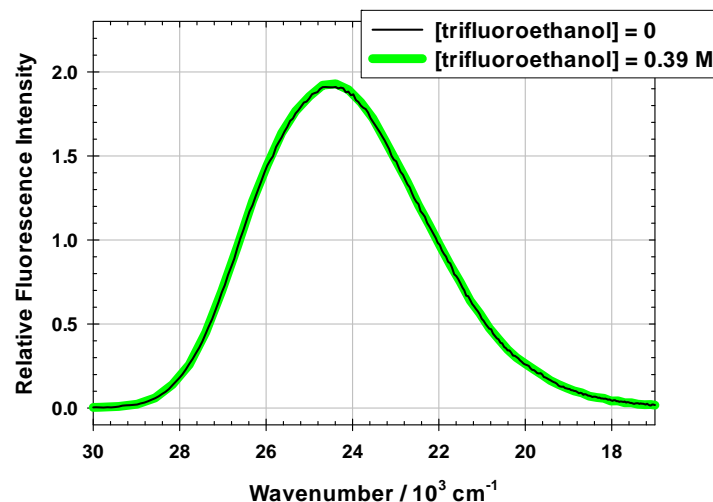

**Figure 10S.** Fluorescence emission spectra of the N-methylquinolinium cation in neat acetonitrile and with addition of 0.39 M of 2,2,2-trifluoroethanol. The spectra were not normalized.  $[\text{MQ}^+] = 9.01 \times 10^{-6} \text{ M}$ .  $\tilde{\nu}_{\text{excitation}} = 31950 \text{ cm}^{-1}$ .

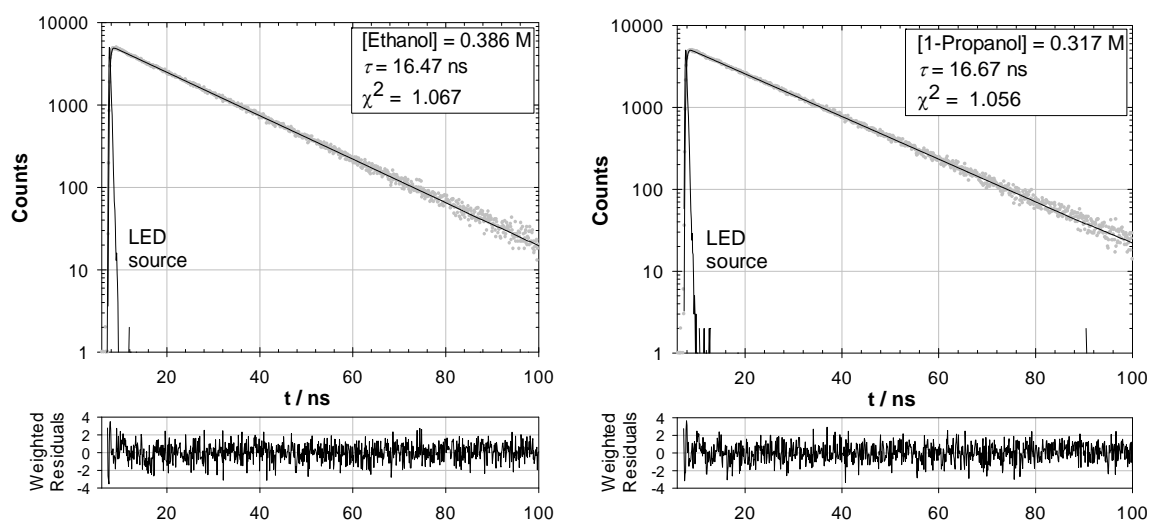

**Figure 11S.** Fluorescence decay of the N-methylquinolinium cation in acetonitrile with addition of 0.386 M ethanol (left,  $[\text{MQ}^+] = 1.02 \times 10^{-4} \text{ M}$ ) and 0.317 M 1-propanol (right,  $[\text{MQ}^+] = 1.00 \times 10^{-4} \text{ M}$ ), and LED source profile. The monoexponential fit and the weighted residuals are also shown.  $\tilde{\nu}_{\text{excitation}} = 32450 \text{ cm}^{-1}$ .  $\tilde{\nu}_{\text{emission}} = 24400 \text{ cm}^{-1}$ .

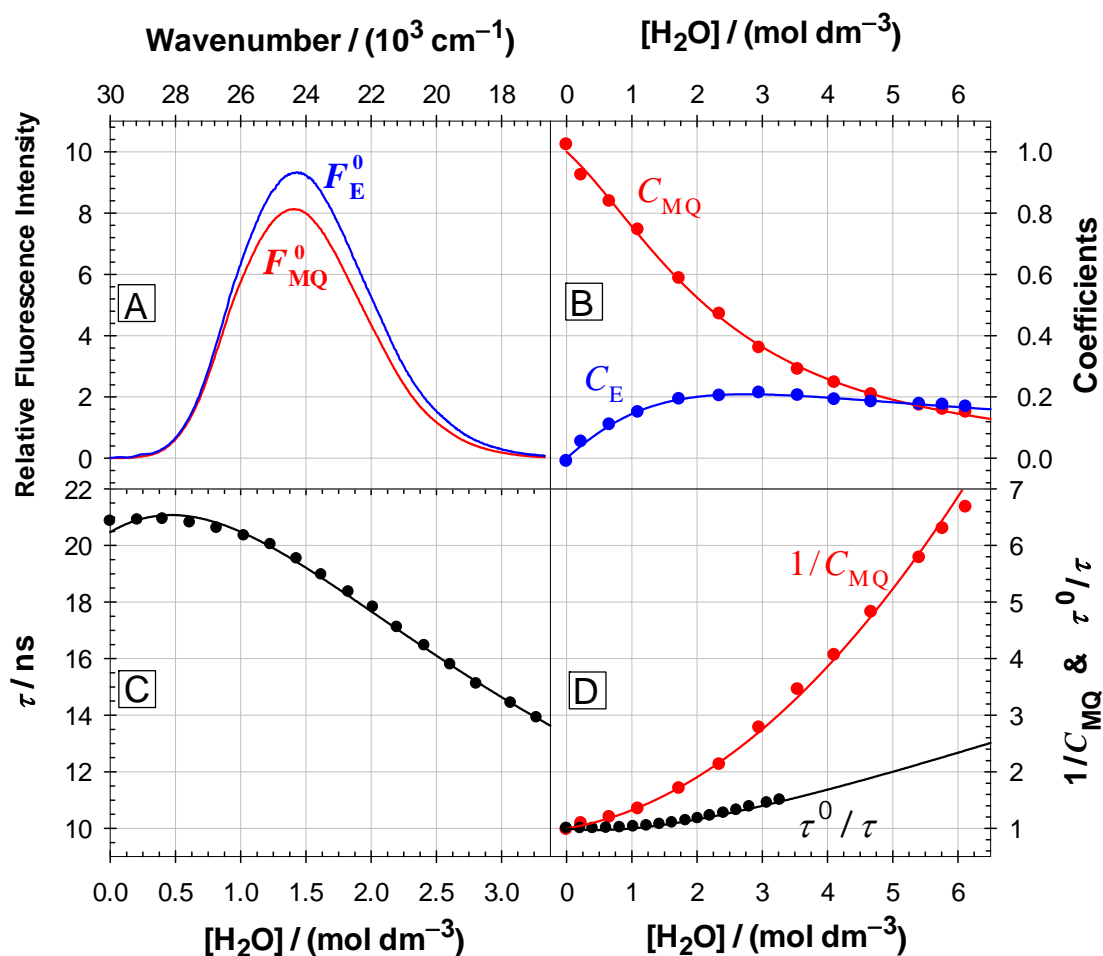

**Figure 12S.** Results of the principal component global analysis of the fluorescence spectra and lifetimes of  $\text{MQ}^+$  in acetonitrile in the presence of water: (A) Component spectra obtained, associated to  $\text{MQ}^{+*}$  ( $F_{\text{MQ}}^0$ ) and the exciplex ( $F_E^0$ ); (B) the coefficients  $C_{\text{MQ}}$  and  $C_E$  representing the contributions of  $\text{MQ}^{+*}$  and  $\text{E}^*$  spectra to the experimental spectrum, and the fit lines; (C) the experimental fluorescence lifetimes and the fit line; (D) the experimental values of  $1/C_{\text{MQ}}$  and  $\tau^0/\tau$ , and the calculated fits.

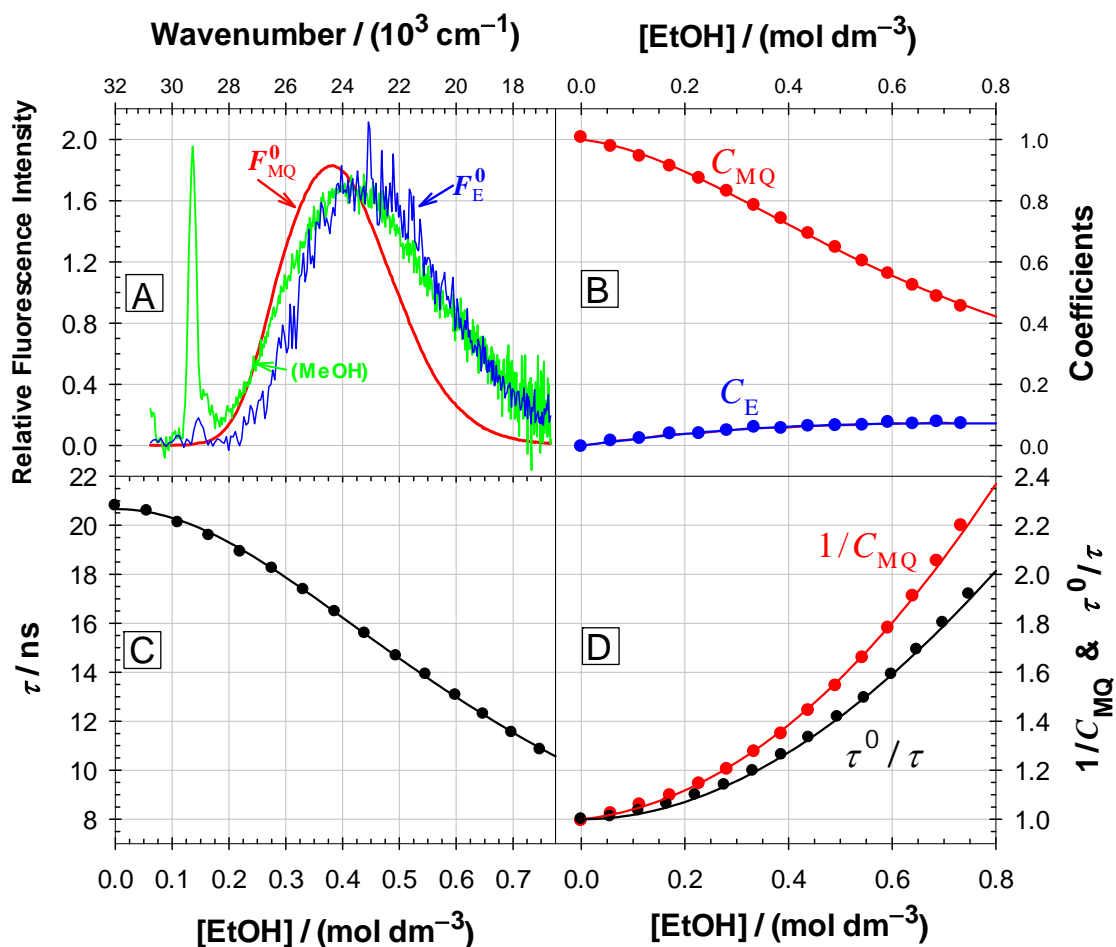

**Figure 13S.** Results of the principal-component global analysis of the fluorescence spectra and lifetimes of  $\text{MQ}^+$  in acetonitrile in the presence of ethanol: (A) Normalized component spectra obtained, associated to  $\text{MQ}^{+*}$  ( $F_{\text{MQ}}^0$ , red line) and the exciplex ( $F_{\text{E}}^0$ , blue line), together with the fluorescence spectrum of  $\text{MQ}^+$  in neat ethanol ( $\nu_{\text{excitation}} = 31950 \text{ cm}^{-1}$ , green line, with solvent Raman band); (B) the coefficients  $C_{\text{MQ}}$  and  $C_{\text{E}}$  representing the contributions of  $\text{MQ}^{+*}$  and  $\text{E}^*$  spectra to the experimental spectrum, and the fit lines; (C) the experimental fluorescence lifetimes and the fit line; (D) the experimental values of  $1/C_{\text{MQ}}$  and  $\tau^0/\tau$ , and the calculated fits.

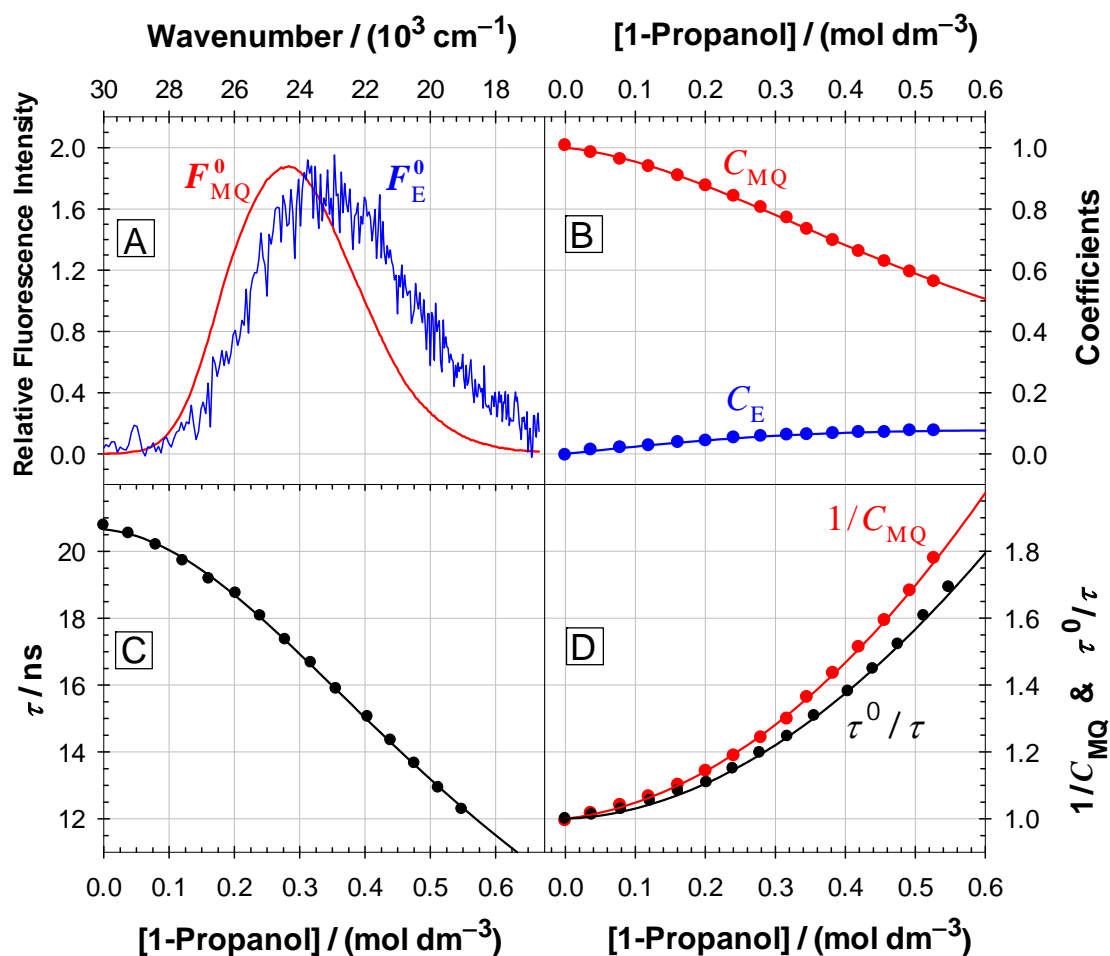

**Figure 14S.** Results of the principal component global analysis of the fluorescence spectra and lifetimes of  $\text{MQ}^+$  in acetonitrile in the presence of 1-propanol: (A) Normalized component spectra obtained, associated to  $\text{MQ}^{+*}$  ( $F_{\text{MQ}}^0$ ) and the exciplex ( $F_{\text{E}}^0$ ); (B) the coefficients  $C_{\text{MQ}}$  and  $C_{\text{E}}$  representing the contributions of  $\text{MQ}^{+*}$  and  $\text{E}^*$  spectra to the experimental spectrum, and the fit lines; (C) the experimental fluorescence lifetimes and the fit line; (D) the experimental values of  $1/C_{\text{MQ}}$  and  $\tau^0/\tau$ , and the calculated fits.

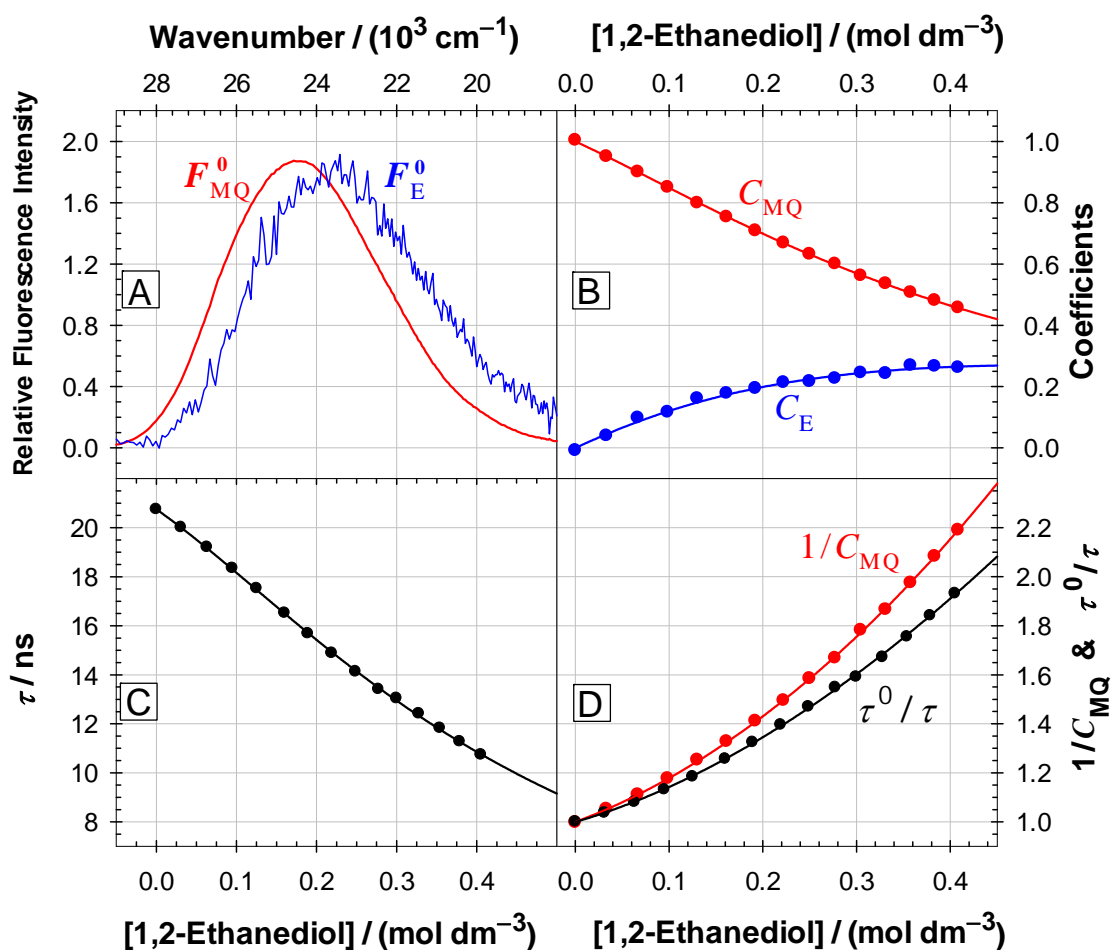

**Figure 15S.** Results of the principal component global analysis of the fluorescence spectra and lifetimes of  $\text{MQ}^+$  in acetonitrile in the presence of 1,2-ethanediol: (A) Normalized component spectra obtained, associated to  $\text{MQ}^{+*}$  ( $F_{\text{MQ}}^0$ ) and the exciplex ( $F_{\text{E}}^0$ ); (B) the coefficients  $C_{\text{MQ}}$  and  $C_{\text{E}}$  representing the contributions of  $\text{MQ}^{+*}$  and  $\text{E}^*$  spectra to the experimental spectrum, and the fit lines; (C) the experimental fluorescence lifetimes and the fit line; (D) the experimental values of  $1/C_{\text{MQ}}$  and  $\tau^0/\tau$ , and the calculated fits.

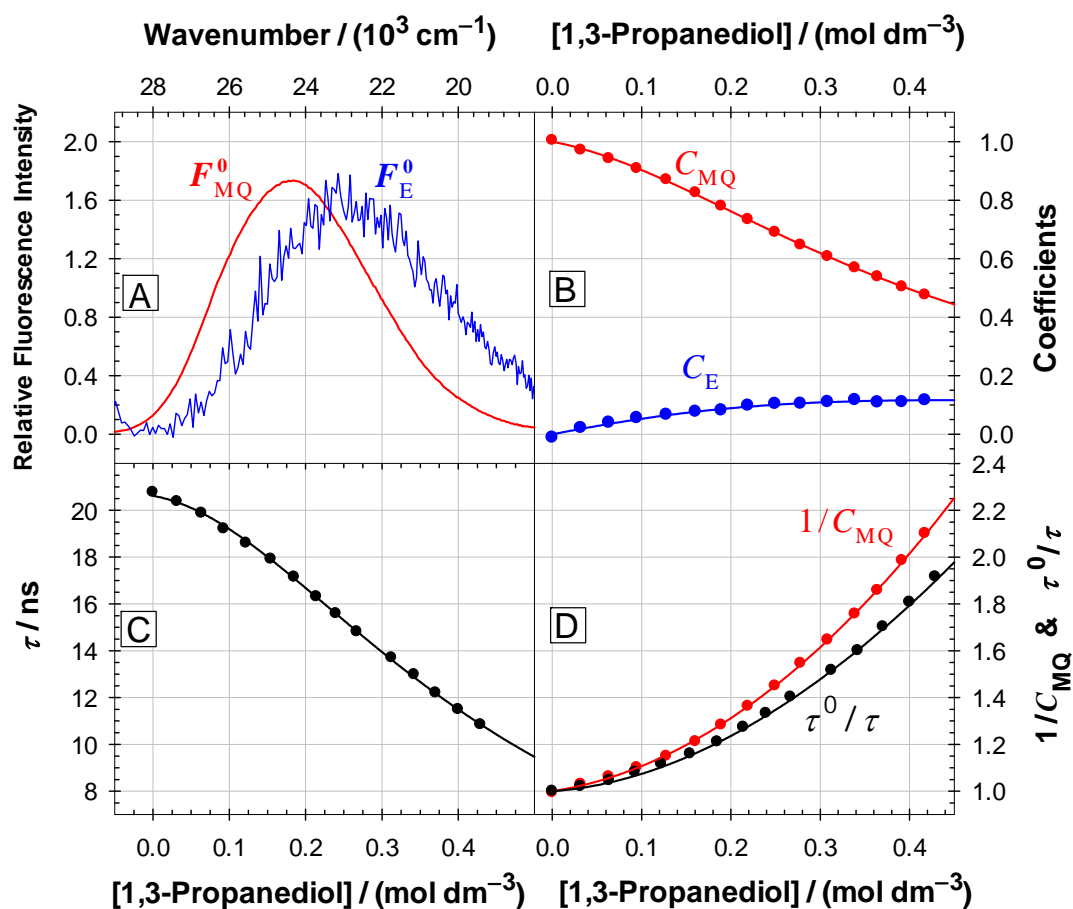

**Figure 16S.** Results of the principal component global analysis of the fluorescence spectra and lifetimes of  $\text{MQ}^+$  in acetonitrile in the presence of 1,3-propanediol: (A) Normalized component spectra obtained, associated to  $\text{MQ}^{+*}$  ( $F_{\text{MQ}}^0$ ) and the exciplex ( $F_{\text{E}}^0$ ); (B) the coefficients  $C_{\text{MQ}}$  and  $C_{\text{E}}$  representing the contributions of  $\text{MQ}^{+*}$  and  $\text{E}^*$  spectra to the experimental spectrum, and the fit lines; (C) the experimental fluorescence lifetimes and the fit line; (D) the experimental values of  $1/C_{\text{MQ}}$  and  $\tau^0/\tau$ , and the calculated fits.

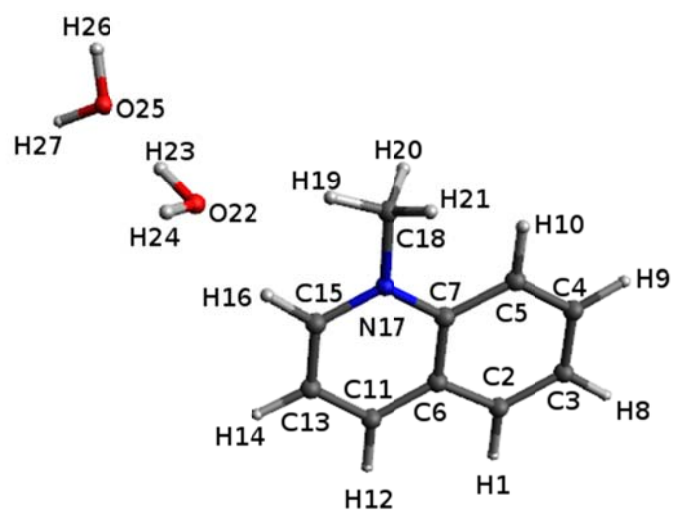

**Figure 17S.** Atom numbering for the complex of  $\text{MQ}^+$  with two water molecules.

**Table 1S. Atomic Cartesian Coordinates for the B3LYP/aug-cc-pVTZ optimized geometry of the MQ<sup>+</sup>-2H<sub>2</sub>O complex in the electronic ground state**

| Atom number | Atom type | x/Å       | y/Å       | z/Å       |
|-------------|-----------|-----------|-----------|-----------|
| 1           | H         | 3.791569  | 1.838906  | 0.425678  |
| 2           | C         | 3.287986  | 0.888509  | 0.314661  |
| 3           | C         | 3.984654  | -0.287867 | 0.389893  |
| 4           | C         | 3.309775  | -1.514386 | 0.243322  |
| 5           | C         | 1.952987  | -1.562768 | 0.023374  |
| 6           | C         | 1.891709  | 0.883707  | 0.089751  |
| 7           | C         | 1.222554  | -0.364952 | -0.057518 |
| 8           | H         | 5.051285  | -0.280833 | 0.561722  |
| 9           | H         | 3.866862  | -2.438721 | 0.304412  |
| 10          | H         | 1.465598  | -2.517880 | -0.084444 |
| 11          | C         | 1.141622  | 2.073129  | 0.006824  |
| 12          | H         | 1.646767  | 3.023417  | 0.118420  |
| 13          | C         | -0.211958 | 2.022136  | -0.212579 |
| 14          | H         | -0.813185 | 2.915511  | -0.280884 |
| 15          | C         | -0.833226 | 0.784049  | -0.352758 |
| 16          | H         | -1.898405 | 0.686282  | -0.528851 |
| 17          | N         | -0.144821 | -0.356849 | -0.278685 |
| 18          | C         | -0.877476 | -1.631021 | -0.439345 |
| 19          | H         | -1.924364 | -1.403090 | -0.611724 |
| 20          | H         | -0.771595 | -2.226704 | 0.464435  |
| 21          | H         | -0.472827 | -2.177144 | -1.288329 |
| 22          | O         | -3.832914 | -0.062113 | -0.888846 |
| 23          | H         | -4.531238 | -0.103405 | -0.207473 |
| 24          | H         | -4.297994 | 0.015103  | -1.727324 |
| 25          | O         | -5.759254 | -0.205215 | 1.139786  |
| 26          | H         | -6.303085 | -0.982769 | 1.302427  |
| 27          | H         | -6.270053 | 0.544671  | 1.461468  |

**Table 2S. Atomic Cartesian Coordinates for the B3LYP/aug-cc-pVTZ optimized geometry of the  $\text{MQ}^+ - 2\text{H}_2\text{O}$  complex in the first-excited singlet state**

| Atom number | Atom type | x/Å       | y/Å       | z/Å       |
|-------------|-----------|-----------|-----------|-----------|
| 1           | H         | 3.853973  | 1.741623  | 0.427688  |
| 2           | C         | 3.309474  | 0.813673  | 0.309308  |
| 3           | C         | 4.029395  | -0.410101 | 0.375715  |
| 4           | C         | 3.347019  | -1.588527 | 0.226544  |
| 5           | C         | 1.953925  | -1.549455 | 0.011637  |
| 6           | C         | 1.910035  | 0.884817  | 0.094733  |
| 7           | C         | 1.223286  | -0.319856 | -0.058559 |
| 8           | H         | 5.096243  | -0.390856 | 0.542048  |
| 9           | H         | 3.850257  | -2.542686 | 0.270111  |
| 10          | H         | 1.426416  | -2.483893 | -0.102301 |
| 11          | C         | 1.212320  | 2.134055  | 0.034674  |
| 12          | H         | 1.741124  | 3.065579  | 0.153033  |
| 13          | C         | -0.166043 | 2.086721  | -0.179255 |
| 14          | H         | -0.746017 | 2.996454  | -0.232050 |
| 15          | C         | -0.825578 | 0.893589  | -0.328869 |
| 16          | H         | -1.888753 | 0.813271  | -0.496714 |
| 17          | N         | -0.137792 | -0.321286 | -0.273011 |
| 18          | C         | -0.897141 | -1.562777 | -0.444700 |
| 19          | H         | -1.937401 | -1.303770 | -0.618704 |
| 20          | H         | -0.835946 | -2.182213 | 0.451063  |
| 21          | H         | -0.529125 | -2.126009 | -1.302965 |
| 22          | O         | -3.883308 | -0.100237 | -0.890407 |
| 23          | H         | -4.587889 | -0.151599 | -0.218470 |
| 24          | H         | -4.340062 | 0.004262  | -1.730251 |
| 25          | O         | -5.859159 | -0.267966 | 1.117300  |
| 26          | H         | -6.436725 | -1.027686 | 1.242550  |
| 27          | H         | -6.341966 | 0.489309  | 1.463525  |
